# Supplementary material for: Inherited and multiple de novo mutations in autism/developmental delay risk genes suggest a multifactorial model
Source: PubMed Central journal article supplement (PMC6293633; doi:10.1186/s13229-018-0247-z), 2018-12-13
Supplement: 13229_2018_247_MOESM10_ESM.pdf [file 13229_2018_247_MOESM10_ESM.pdf]

NM\_001396.4 → NP\_001387.2

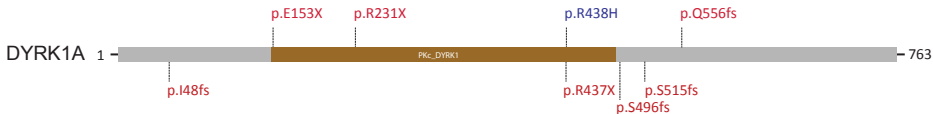

NM\_030632.2 → NP\_085135.1

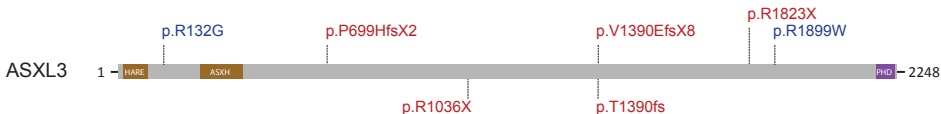

NM\_014991.4 → NP\_055806.2

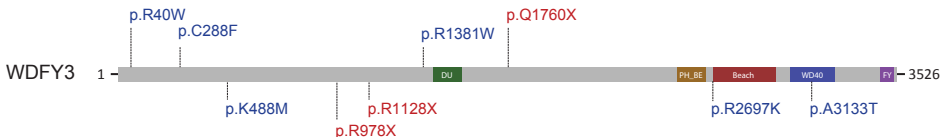

NM\_001110792.1 → NP\_001104262.1

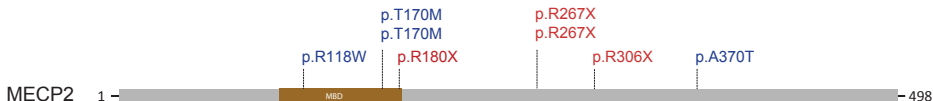

Red = LGD DNM; Blue = missense DNM
