# Supplementary material for: Inherited and multiple de novo mutations in autism/developmental delay risk genes suggest a multifactorial model
Source: PubMed Central journal article supplement (PMC6293633; doi:10.1186/s13229-018-0247-z), 2018-12-13

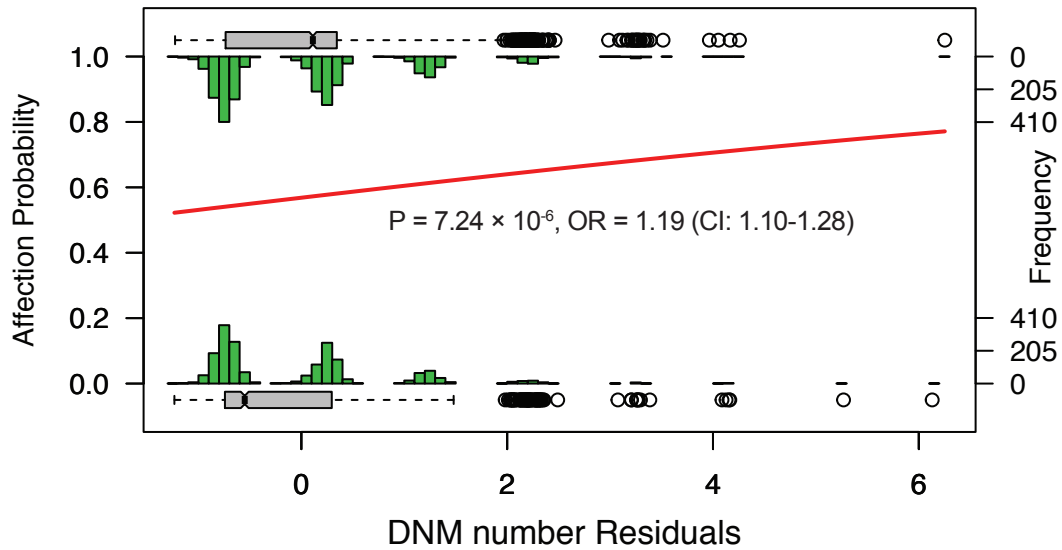

Supplement: 13229_2018_247_MOESM12_ESM.pdf [file 13229_2018_247_MOESM12_ESM.pdf]
