# Supplementary material for: Inherited and multiple de novo mutations in autism/developmental delay risk genes suggest a multifactorial model
Source: Springer Nature journal article supplement (doi:10.1186/s13229-018-0247-z), 2018-12-01
Supplement: MOESM1 [file 16340674]

## Phase I

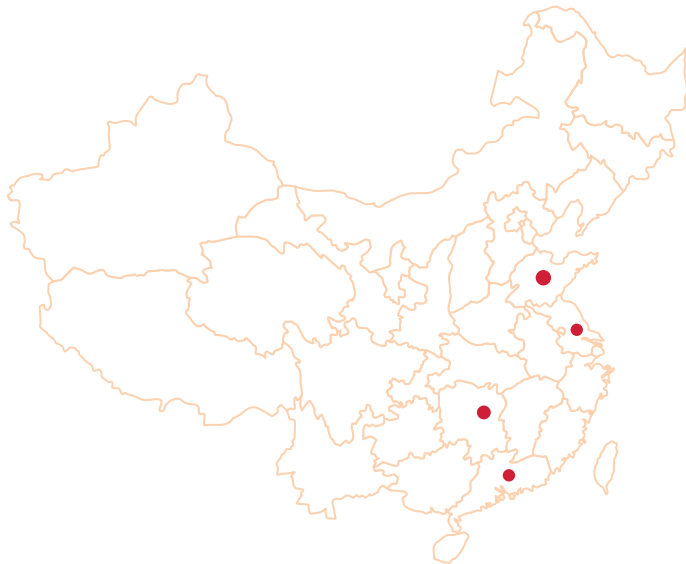

## Phase II

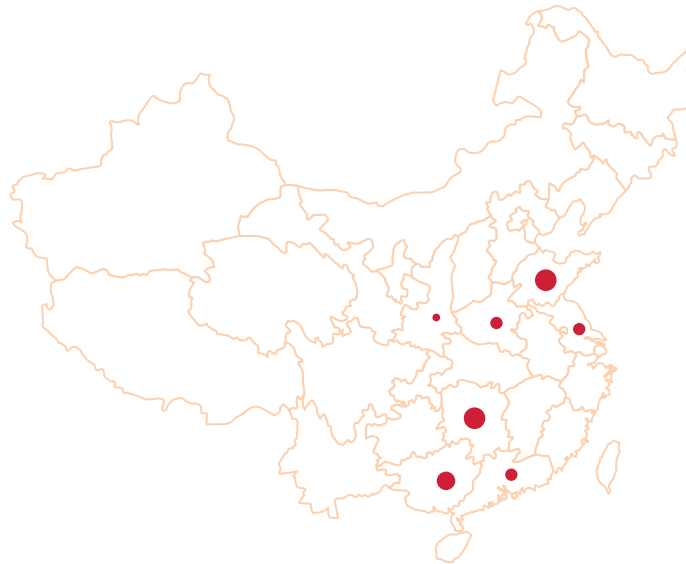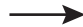

- 0-100
- 101-250
- 251-400
- 401-550
- 551-700
- 701-850
- 851-1000

Hunan: Mental Health Institute, the Second Xiangya Hospital, Central South University, Changsha, Hunan, China  
Guangdong: Children's Development Behavior Center, Third Affiliated Hospital of Sun Yat-sen University, Guangzhou, Guangdong, China  
Shandong: Mental Health Center of Shandong Province, Jinan, Shandong, China  
Jiangsu: Child Mental Health Research Center, Nanjing Brain Hospital Affiliated of Nanjing Medical University, Nanjing, Jiangsu, China  
Guangxi: Child Healthcare Department, Liuzhou Maternity and Child Healthcare Hospital, Liuzhou, Guangxi, China  
Henan: Child Healthcare Department, The Third affiliated hospital of Zhengzhou University, Zhengzhou, Henan China  
Shaanxi: Xi 'an Encephalopathy Hospital of Traditional Chinese Medicine, Xi 'an, Shaanxi, China
