# Supplementary material for: Inherited and multiple de novo mutations in autism/developmental delay risk genes suggest a multifactorial model
Source: Springer Nature journal article supplement (doi:10.1186/s13229-018-0247-z), 2018-12-01

NM\_001040142.1 → NP\_001035232.1

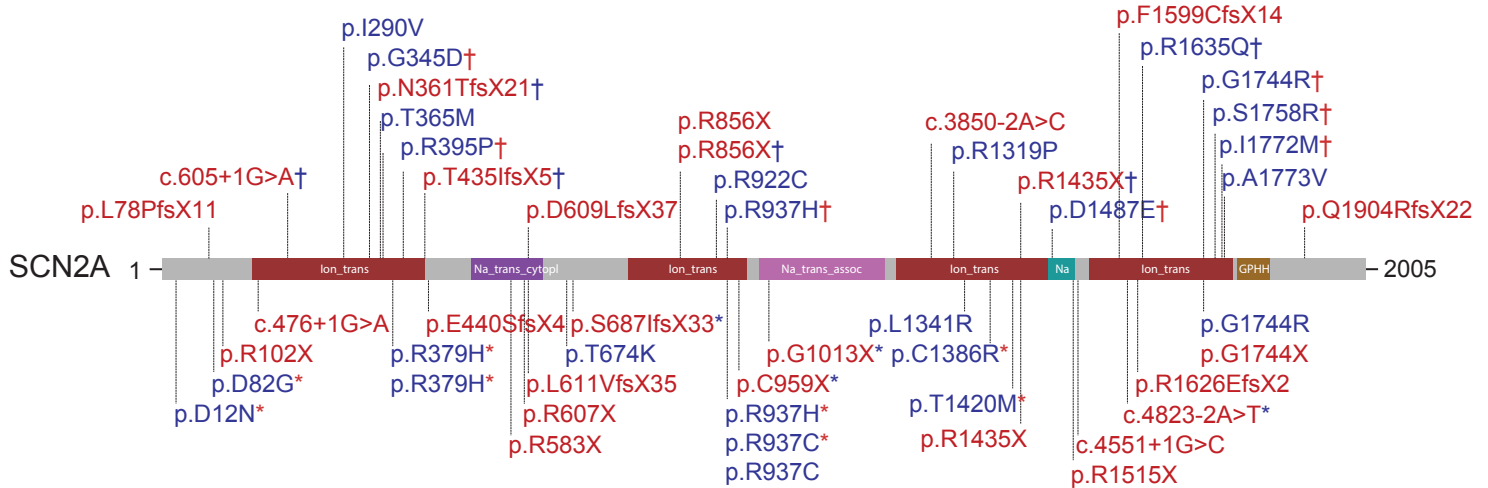

NM\_001170629.1 → NP\_001164100.1

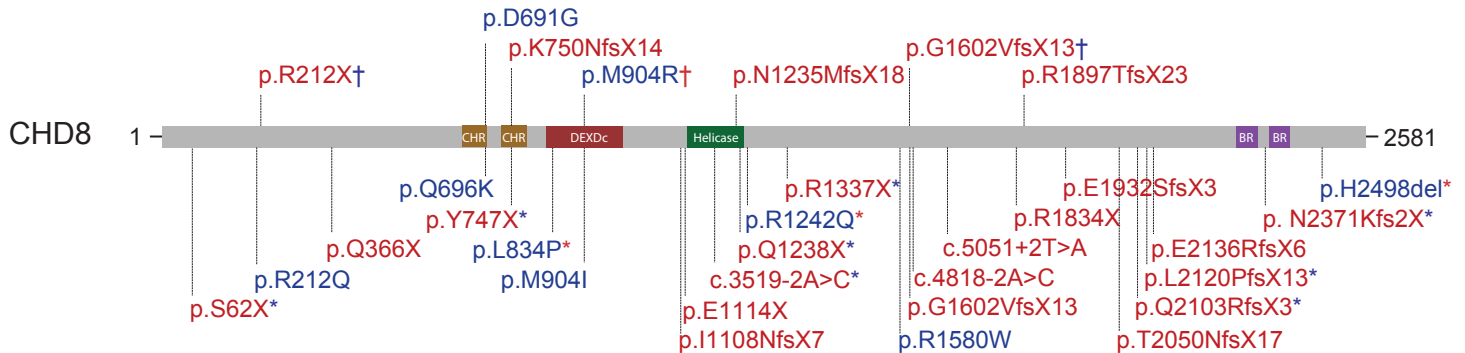

Supplement: MOESM8 [file 16340674]
