# Supplementary material for: Inherited and multiple de novo mutations in autism/developmental delay risk genes suggest a multifactorial model
Source: Springer Nature journal article supplement (doi:10.1186/s13229-018-0247-z), 2018-12-01

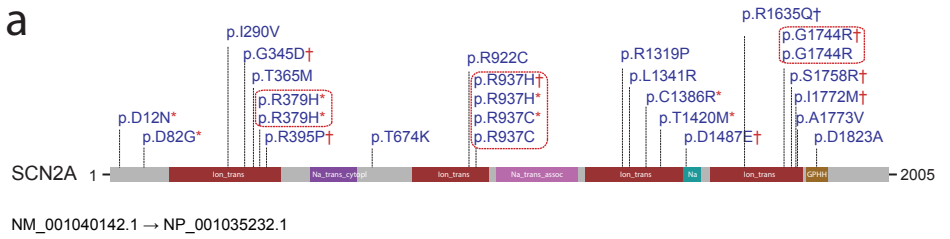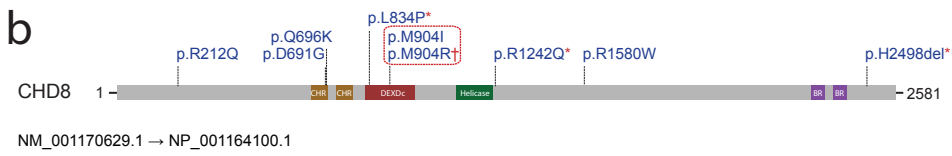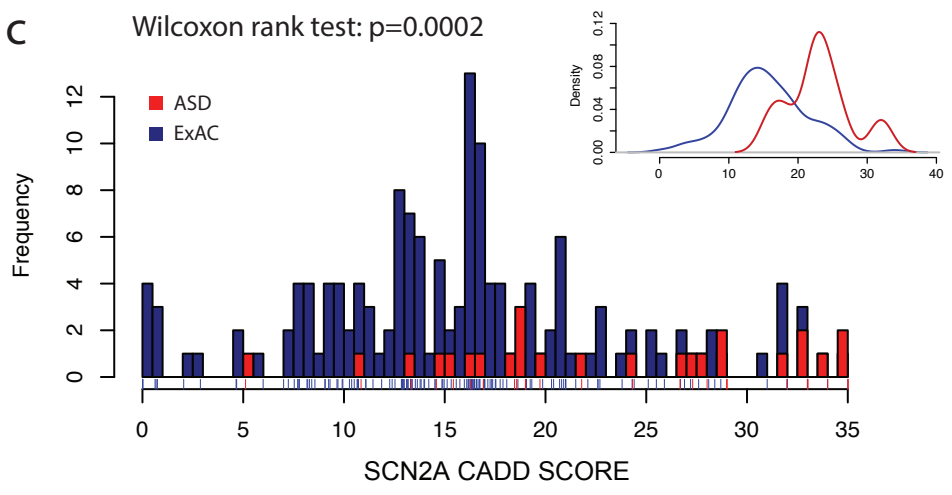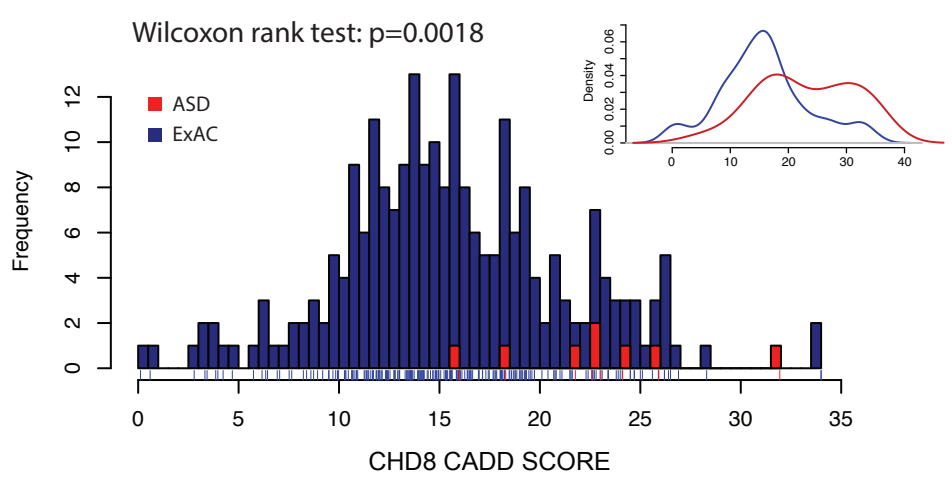

Supplement: MOESM9 [file 16340674]
