# Supplementary material for: Inherited and multiple de novo mutations in autism/developmental delay risk genes suggest a multifactorial model
Source: Mol Autism. 2018 Dec 13;9:64. doi: 10.1186/s13229-018-0247-z (PMC6293633; doi:10.1186/s13229-018-0247-z)
Supplement: Supplementary file 11 — Data 5. Summary of clinical information for some patients with DNMs. (XLSX 19 kb) [file 13229_2018_247_MOESM11_ESM.xlsx]

## Sheet: clinical data of cases with DNM
PatientID	M32110	GX0083.p1	GX0149.p1	GX0384.p1	GX0251.p1	HEN0362.p1	GX0493.p1	HEN0083.p1	M31980	M32001	GX0263.p1	HN0072.p1	HEN0102.p1	HN0026.p1	HN0004.p1	HN0070.p1	GX0341.p1	HN0112.p1	HN0181.p1	GX0086.p1	M32023	M02463
gene	ANK2	ASXL3	ASXL3	ASXL3	CDKL5	CHD2	CHD8	CHD8	CTTNBP2	CTTNBP2	CUL3	DDX3X	DYRK1A	DYRK1A	FOXP1	MED13L	RALGAPB	SHANK2	WAC	WHSC1	ZNF292	ZNF292
mutation	p.Arg1003*	p.Arg1823*	p.Thr1390fs	p.Pro699Hisfs*2	p.Tyr704*	c.2506-2A>G	p.Arg212*	p.Gly1602Valfs*13	p.Phe884*	p.Val1158Glufs*4	p.Pro582Leu	c.46-2A>G	p.Val558Cysfs*34	p.Arg231*	p.Leu414Argfs*60	p.Asn1241Glufs*9	p.N643Kfs*3	p.Tyr29*	p.Glu88Glyfs*103	p.Ala1262Ser	p.S1473Ffs*5	p.Ser832Ilefs*28
Sex	M	M	F	M	F	M	F	M	F	M	M	F	M	F	M	M	F	M	F	M	Male	Male
ASD	+	+	+	-	+	+	+	+	+	+	+	+	+	+	+	+	+	+	+	+	+	+
Intellectual disability	+	-	+	+	+	+(mild)	+	na	+	na	+	na	+	+	+	na	+	+	+(mild)	+	- (WAIS:108)	mild
Developmental delay (motor)	na	+	+	+(severe)	+	-	+	+	na	na	-	-	-	na	+	+	+	-	+	-	NA	NA
Developmental delay (speech)	+	-	+	+(severe)	+	+	+	+	+	+	+	+	+	+	+	+	+	+	+	+	+	+
repetitive behavior	+	+	+	+	+	+	+	+	+	+	+	+	+	+	+	na	+	+	+	+	+	+
Macrocephaly	-	-	-	-	-	-	>+1SD	+(>+2SD)	-	>+1SD	-	+	na	-	+(>+2SD)	-	-	-	>+1SD	-	NA	NA
Microcephaly	<-1SD	-	-1.5SD	-	+(-3SD)	<-1SD	-	-	-	-	-	-	na	+(<-3SD)	-	-	-	-	-	-	NA	NA
EEG	na	-	-	-	+	+	-	na	na	na	-	-	na	na	-	-	-	-	-	na	+	+
MRI	+	-	-	-	-	-	-	na	na	na	-	-	na	na	-	-	-	-	-	+	NA	-
Regression	na	-	na	-	na	+	na	na	na	na	-	+(language)	-	-	-	-	+	-	+(language)	-	-	-
Seizures	-	-	-	-	+	+	-	-	-	-	-	-	-	-	-	-	-	-	-	-	-	-
Sleep problems	+	-	-	-	+	-	+	+	+	+	-	-	-	-	+	-	+	-	+	+	-	-
GI disturbances	-	+	-	-	-	-	-	+	-	-	-	+	-	-	+	+	-	-	-	+	-	-
Hypotonia	na	+	na	+	-	-	+	+	na	na	-	na	-	+	-	-	-	-	+	-	NA	NA
Hypertonia	na	-	na	-	-	-	-	-	na	na	-	na	-	+	-	+	-	-	-	-	NA	NA
Hyperactive behavior	+	-	-	-	-	+	+	+	+	+	+	+	+	+	+	+	+	-	+	+	-	+
Attentional problems	+	-	-	-	-	+	+	+	+	+	+	+	+	+	+	-	+	+	+	+	-	+
Anxiety	-	-	na	-	-	-	-	+	-	+	-	na	+	na	na	na	+	-	-	-	NA	NA
Aggressive behavior	-	-	-	-	-	+	-	-	-	-	-	-	+	-	-	-	-	-	-	-	-	-
obsessive behavior	-	-	na	-	-	-	-	-	+	-	-	na	+	-	-	+	+	-	-	-	NA	NA
Febrile seizures infancy	-	-	-	-	-	-	-	-	-	-	-	-	-	+	-	-	-	+	-	-	-	-
C section	-	+	-	+	-	-	+	na	-	+	-	+	na	-	-	+	+	-	+	+	-	+
premature birth	-	-	-	-	-	na	-	-	-	-	-	-	-	-	+	+	-	-	-	-	-	-
Neonatal feeding problems	-	+	+	-	-	na	-	na	-	-	-	-	na	-	-	-	-	-	-	+	-	-
Childhood feeding problems	+	+	-	-	+	+	-	+	-	+	-	-	+	-	-	+	-	-	-	+	-	-
Congenital Heart Disease	-	-	+	-	-	-	-	-	-	-	-	-	-	-	-	+	-	-	-	-	-	-
karyotype	46,XY	46, XY	46, XX	46,XY	46, XX	46,XY,14pstk+	46,XX	46,XY	46,XX,inv(9)(p12q13)	46,XY	46, XY	46,XX	46,XY	46,XX	46,XY,22ps+	46,XY	46,XX	46,XY	46,XX	46, XY	46, XY	NA

## Sheet: clinical data of SCN2A patients
	DN LOF mutations						DN missense mutations
PatientID	GX0205.p1	GX0234.p1	HEN0329.p1	HN0130.p1	M23243	GX0569.p1	M30859	M19672	M23149	M15222	SX0030.p1	SX0006.p1	HEN0278.p1	HEN0138.p1	GX0421.p1	GX0363.p1	M32128
gene	SCN2A	SCN2A	SCN2A	SCN2A	SCN2A	SCN2A	SCN2A	SCN2A	SCN2A	SCN2A	SCN2A	SCN2A	SCN2A	SCN2A	SCN2A	SCN2A	SCN2A
mutation (NM_001040142)	p.Asn361Thrfs*21	p.Arg1435*	p.Arg856*	p.Thr435Ilefs*5	p. Phe1599Cysfs*14	c.605+1G>T	p.Arg937His	p.Thr365Met	p.Ala1773Val	p.Arg1319Pro	p.Asp1487Glu	p.Gly1744Arg	p.Ile1772Met	p.Arg1635Gln	p. Ser1758Arg	p. Arg922Cys	p.Arg395P
Sex	M	M	F	F	M	M	F	M	M	M	F	M	M	M	M	M	F
ASD	+	+	+	+	+	+	+	+	+	+	+	+	+	+	+	+	+
Intellectual disability	+	+	+	na	+	+	na	+	+	+	+	+	+	+	+	+	+
Developmental delay (motor)	+	+	+	-	+	+	na	+	+	+	+	+	+	+	+	+	+
Developmental delay (speech)	+	+	+	+	+	+	+	+	+	+	+	+	+	+	+	+	+
repetitive behavior	+	+	+	+	+	+	+	+	+	+	+	+	+	+	+	+	+
Macrocephaly	-	-	-	-	+	-	-	na	na	na	+	+	na	-	+	-	na
Microcephaly	-	-	-	-	-	+	-	na	na	na	-	-	na	+	-	-	na
EEG	+	+	-	-	-	na	-	-	-	+	+	-	-	-	na	+	na
MRI	-	-	-	-	na	+	na	na	na	na	+	-	-	-	-	na	+
Regression	+	na	+	-	-	-	na	-	-	+	+	+	+	-	-	-	-
Seizures	+	-	-	-	-	-	-	-	-	+	+	-	-	-	-	-	-
Sleep problems	+	+(before 4 years)	+	-	-	+	-	na	-	na	+	-	+	-	-	-	+
GI disturbances	-	-	-	-	+	na	-	na	-	na	+	-	-	-	-	+	+
Hypotonia	-	-	-	na	na	-	na	na	na	na	-	-	-	+	-	+	na
Hypertonia	-	-	-	na	na	-	na	na	na	na	+	-	+	-	-	-	na
Hyperactive behavior	+	+	+	-	+	+	+	+	+	+	+	+	+	+	+	+	+
Attentional problems	+	+	+	+	+	+	+	+	+	+	+	+	+	+	+	+	+
Anxiety	-	+	-	na	-	-	+	+	na	-	-	-	-	-	-	-	-
Aggressive behavior	-	-	-	-	-	-	-	-	-	-	+	-	-	-	-	-	-
obsessive behavior	-	-	+	na	+	-	-	na	-	+	+	-	-	-	-	-	-
Febrile seizures infancy	+	-	-	-	-	-	-	-	-	-	+	-	-	-	-	-	-
C section	-	-	+	-	+	+	-	-	-	-	+	+	-	-	-	+	+
premature birth	-	-	-	-	-	-	-	-	+	-	-	-	-	+	-	-	-
Neonatal feeding problems	+	-	na	+	-	+	-	-	-	-	+	-	-	-	-	-	-
Childhood feeding problems	+	-	-	-	-	+	-	-	-	-	-	-	-	-	-	+	-
Congenital Heart Disease	-	-	-	-	-	-	-	-	-	-	-	-	-	-	-	-	-
karyotype	46, XY	46,XY	46,XX	46,XX	46, XY	46, XY	46,XX	46, XY	46, XY	46, XY	46,XX	46, XY	46, XY	46, XY	46, XY	46, XY	46,XX
